# Supplementary material
Source: PubMed Central journal article supplement (PMC5637175)
Supplement: JB.00418-17_zjb999094548s1.pdf [file JB.00418-17_zjb999094548s1.pdf]

## Supplemental Material

Soltes *et al.*, Distinctive roles for periplasmic proteases in the maintenance of essential outer membrane protein assembly

### Supplemental Material References:

1. **Ruiz N, Falcone B, Kahne D, Silhavy TJ.** 2005. Chemical conditionality: a genetic strategy to probe organelle assembly. *Cell* **121**:307–17.
2. **Chimalakonda G, Ruiz N, Chng S-S, Garner RA, Kahne D, Silhavy TJ.** 2011. Lipoprotein LptE is required for the assembly of LptD by the beta-barrel assembly machine in the outer membrane of *Escherichia coli*. *Proc Natl Acad Sci USA* **108**:2492–7.
3. **Rigel NW, Schwalm J, Ricci DP, Silhavy TJ.** 2012. BamE modulates the *Escherichia coli* beta-barrel assembly machine component BamA. *J Bacteriol* **194**:1002–8.
4. **Schwalm J, Mahoney TF, Soltes GR, Silhavy TJ.** 2013. A role for Skp in LptD assembly in *Escherichia coli*. *J Bacteriol* **195**:3734–3742.
5. **Wu T, McCandlish AC, Gronenberg LS, Chng S-S, Silhavy TJ, Kahne D.** 2006. Identification of a protein complex that assembles lipopolysaccharide in the outer membrane of *Escherichia coli*. *Proc Natl Acad Sci USA* **103**:11754–11759.
6. **Ricci DP, Hagan CL, Kahne D, Silhavy TJ.** 2012. Activation of the *Escherichia coli*  $\beta$ -barrel assembly machine (Bam) is required for essential components to interact properly with substrate. *Proc Natl Acad Sci USA* **109**:3487–91.
7. **Ruiz, N., Gronenberg, L. S., Kahne, D. & Silhavy, T. J.** 2008. Identification of two inner- membrane proteins required for the transport of lipopolysaccharide to the outer membrane of *Escherichia coli*. *Proc Natl Acad Sci USA* **105**, 5537–5542.
8. **Sutterlin, H.,** 2016. In preparation

**Table S1: Strains and Plasmids**

| <i>E. coli</i> K-12 |                                  |            |
|---------------------|----------------------------------|------------|
| strains             | Genotype and relevant features   | Reference  |
| NR754               | MC4100 <i>ara+ / r</i>           | (7)        |
| NR698               | MC4100 <i>lptD4213</i>           | (1)        |
| HC340               | $\Delta$ <i>lptD</i> pLptD       | (8)        |
| HC1036              | $\Delta$ <i>lptD</i> pLptD Y721D | (8)        |
| GS583               | NR754 <i>degP::kan</i>           | This study |
| GS584               | NR754 <i>degQ::kan</i>           | This study |
| GS585               | NR754 <i>ompT::kan</i>           | This study |
| GS586               | NR754 <i>ptrA::kan</i>           | This study |
| GS587               | NR754 <i>tsp::kan</i>            | This study |

|        |                                                                     |            |
|--------|---------------------------------------------------------------------|------------|
| GS588  | NR754 <i>ycaL::kan</i>                                              | This study |
| GS589  | NR754 <i>ydgD::kan</i>                                              | This study |
| GS590  | NR754 <i>yggG::kan</i>                                              | This study |
| GS603  | NR754 <i>yfgC::kan</i>                                              | This study |
| GS605  | NR754 <i>yhiJ::kan</i>                                              | This study |
| GS600  | NR698 <i>degP::kan</i>                                              | This study |
| GS601  | NR698 <i>degQ::kan</i>                                              | This study |
| GS602  | NR698 <i>ompT::kan</i>                                              | This study |
| GS604  | NR698 <i>yfgC::kan</i>                                              | This study |
| GS606  | NR698 <i>yhiJ::kan</i>                                              | This study |
| GS607  | NR698 <i>ycaL::kan</i>                                              | This study |
| GS608  | NR698 <i>yggG::kan</i>                                              | This study |
| GS609  | NR698 <i>ydgD::kan</i>                                              | This study |
| GS610  | NR698 <i>ptrA::kan</i>                                              | This study |
| GS615  | HC340 <i>degP::kan</i>                                              | This study |
| GS616  | HC1036 <i>degP::kan</i>                                             | This study |
| GS617  | HC340 <i>degQ::kan</i>                                              | This study |
| GS618  | HC1036 <i>degQ::kan</i>                                             | This study |
| GS619  | HC340 <i>ompT::kan</i>                                              | This study |
| GS620  | HC1036 <i>ompT::kan</i>                                             | This study |
| GS621  | HC340 <i>ptrA::kan</i>                                              | This study |
| GS622  | HC1036 <i>ptrA::kan</i>                                             | This study |
| GS623  | HC340 <i>tsp::kan</i>                                               | This study |
| GS624  | HC1036 <i>tsp::kan</i>                                              | This study |
| GS625  | HC340 <i>ycaL::kan</i>                                              | This study |
| GS626  | HC1036 <i>ycaL::kan</i>                                             | This study |
| GS627  | HC340 <i>ydgD::kan</i>                                              | This study |
| GS628  | HC1036 <i>ydgD::kan</i>                                             | This study |
| GS629  | HC340 <i>yggG::kan</i>                                              | This study |
| GS630  | HC1036 <i>yggG::kan</i>                                             | This study |
| GS631  | HC340 <i>yfgC::kan</i>                                              | This study |
| GS632  | HC1036 <i>yfgC::kan</i>                                             | This study |
| GS633  | HC340 <i>yhiJ::kan</i>                                              | This study |
| GS634  | HC1036 <i>yhiJ::kan</i>                                             | This study |
| HC1289 | $\Delta$ <i>lptD</i> <i>bamA</i> F494L <i>yaeH::cam</i> pLptD       | (8)        |
| HC1290 | $\Delta$ <i>lptD</i> <i>bamA</i> F494L <i>yaeH::cam</i> pLptD Y721D | (8)        |
| GC169  | $\Delta$ <i>lptE</i> pLptE                                          | (2)        |
| GC192  | $\Delta$ <i>lptE</i> pLptE6                                         | (2)        |
| GS669  | GC169 <i>degP::kan</i>                                              | This study |
| GS670  | GC192 <i>degP::kan</i>                                              | This study |
| GS671  | GC169 <i>tsp::kan</i>                                               | This study |
| GS672  | GC192 <i>tsp::kan</i>                                               | This study |
| GS673  | GC169 <i>ycaL::kan</i>                                              | This study |

|        |                                                       |            |
|--------|-------------------------------------------------------|------------|
| GS674  | GC192 <i>ycaL::kan</i>                                | This study |
| GS675  | GC169 <i>ydgD::kan</i>                                | This study |
| GS676  | GC192 <i>ydgD::kan</i>                                | This study |
| GS677  | GC169 <i>yfgC::kan</i>                                | This study |
| GS678  | GC192 <i>yfgC::kan</i>                                | This study |
| JAS16  | NR754 $\Delta$ <i>surA</i>                            | (3)        |
| JAS420 | NR754 $\Delta$ <i>skp</i> $\Delta$ <i>fkpA</i>        | (4)        |
| GS885  | JAS16 <i>yfgC::kan</i>                                | This study |
| GS352  | JAS16 <i>degP::kan</i>                                | This study |
| GS1036 | JAS420 <i>yfgC::kan</i>                               | This study |
| GS1043 | JAS420 <i>degP::kan</i>                               | This study |
| GS968  | NR754 <i>bamB::kan</i>                                | This study |
| GS969  | NR754 $\Delta$ <i>ycaL bamB::kan</i>                  | This study |
| GS970  | NR754 <i>bamE::kan</i>                                | This study |
| GS971  | NR754 $\Delta$ <i>ycaL bamE::kan</i>                  | This study |
| GS1003 | NR754 $\Delta$ <i>lptD ycaL</i> pLptD                 | This study |
| GS1004 | NR754 $\Delta$ <i>lptD ycaL</i> pLptD Y721D           | This study |
| GS1013 | NR754 $\Delta$ <i>lptD ycaL</i> pLptD pBamD           | This study |
| GS1014 | NR754 $\Delta$ <i>lptD ycaL</i> pLptD pBamD O/E       | This study |
| GS1015 | NR754 $\Delta$ <i>lptD ycaL</i> pLptD Y721D pBamD     | This study |
| GS1016 | NR754 $\Delta$ <i>lptD ycaL</i> pLptD Y721D pBamD O/E | This study |
| GS1056 | NR754 $\Delta$ <i>lptD ddegP</i> pLptD                | This study |
| GS1057 | NR754 $\Delta$ <i>lptD ddegP</i> pLptD Y721D          | This study |
| GS1058 | NR754 $\Delta$ <i>lptD yfgC</i> pLptD                 | This study |
| GS1059 | NR754 $\Delta$ <i>lptD yfgC</i> pLptD Y721D           | This study |

---

| <b>Plasmids</b> | <b>Description</b>                                                     |     |
|-----------------|------------------------------------------------------------------------|-----|
| pLptD           | pET2342:: <i>LptD</i> WT Amp <sup>r</sup>                              | (5) |
| pLptE           | <i>lptE</i> cloned into the inducible pBAD18 plasmid, Amp <sup>r</sup> | (2) |
| pZS21           | Low-copy vector; Kan <sup>r</sup>                                      | (6) |
| pBamD           | <i>bamD</i> cloned into pZS21                                          | (3) |
| pBamD O/E       | Unknown mutation in pZS21 backbone that increases copy number          | (3) |

**Table S2:** Outer membrane permeability phenotypes of constructed *ycaL* mutants

| Genotype         | Background    |               |
|------------------|---------------|---------------|
|                  | $\Delta bamB$ | $\Delta bamE$ |
|                  | OM Phenotype  | OM Phenotype  |
| MC4100           | +             | ++            |
| <i>ycaL::kan</i> | +             | ++            |

**OM Phenotype:** ++++ denotes growth similar to WT in the presence of antibiotics, whereas - denotes no growth.
